RESEARCH ARTICLE

# Parameters-tuning of PID controller for automatic voltage regulators using the African buffalo optimization

Julius Beneoluchi Odili<sup>1\*</sup>, Mohd Nizam Mohmad Kahar<sup>1</sup>, A. Noraziah<sup>1,2</sup>

**1** Faculty of Computer Systems and Software Engineering, Universiti Malaysia Pahang, Kuantan, Malaysia, **2** IBM Centre of Excellence, Universiti Malaysia Pahang, Kuantan, Malaysia

\* [odili\\_julest@yahoo.com](mailto:odili_julest@yahoo.com)

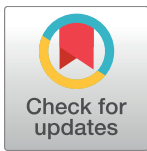

## Abstract

In this paper, an attempt is made to apply the African Buffalo Optimization (ABO) to tune the parameters of a PID controller for an effective Automatic Voltage Regulator (AVR). Existing metaheuristic tuning methods have been proven to be quite successful but there were observable areas that need improvements especially in terms of the system's gain overshoot and steady state errors. Using the ABO algorithm where each buffalo location in the herd is a candidate solution to the Proportional-Integral-Derivative parameters was very helpful in addressing these two areas of concern. The encouraging results obtained from the simulation of the PID Controller parameters-tuning using the ABO when compared with the performance of Genetic Algorithm PID (GA-PID), Particle-Swarm Optimization PID (PSO-PID), Ant Colony Optimization PID (ACO-PID), PID, Bacteria-Foraging Optimization PID (BFO-PID) etc makes ABO-PID a good addition to solving PID Controller tuning problems using metaheuristics.

## OPEN ACCESS

**Citation:** Odili JB, Mohmad Kahar MN, Noraziah A (2017) Parameters-tuning of PID controller for automatic voltage regulators using the African buffalo optimization. PLoS ONE 12(4): e0175901. <https://doi.org/10.1371/journal.pone.0175901>

**Editor:** Xiaosong Hu, Chongqing University, CHINA

**Received:** December 28, 2016

**Accepted:** April 2, 2017

**Published:** April 25, 2017

**Copyright:** © 2017 Odili et al. This is an open access article distributed under the terms of the [Creative Commons Attribution License](https://creativecommons.org/licenses/by/4.0/), which permits unrestricted use, distribution, and reproduction in any medium, provided the original author and source are credited.

**Data Availability Statement:** Experimental data available at [https://figshare.com/account/home/](https://figshare.com/account/home/as) as African Buffalo Optimization dataset for tuning parameters of a PID Controller for an Automatic Voltage Regulator, DOI = [10.6084/m9.figshare.4868369](https://doi.org/10.6084/m9.figshare.4868369).

**Funding:** The authors are grateful to the Faculty of Computer Systems and Software Engineering, Universiti Malaysia Pahang, for funding this study under Grant GRS 1403118. Also the Ministry of Higher Education, Malaysia for additional funding under Fundamental Research Grant Scheme RDU 140101.

## 1. Introduction

All over the world, process control is a major consideration in design and production engineering [1]. The main purpose of control systems is to steer the system in such a way as to obtain the expected dynamic response as well as the static requirements of a closed loop system [2]. In every industrial process, production engineers are concerned with ensuring that the actual output matches the predetermined results. To achieve this, some level of control procedures are required. This development has led to the design of different techniques of process control. Some of these techniques are numerical, others are neural, adaptive, metaheuristic or fuzzy control processes etc [3]. Among these several techniques, the Proportional-Integral-Derivative (PID) control systems are about the most popular.

Proportional-Integral-Derivative (PID) Controller is a feedback loop control technique that is used in many scientific, engineering and industrial control establishments, especially for systems that have been designed with accurate mathematical models [4, 5]. The PID controller calculates the three system coefficients: proportional, integral and derivative parameter values. The proportional component of the PID is concerned with the calculation of the values of the

**Competing interests:** The authors have declared that no competing interests exist.

recent error; the integral component determines the output of the sum of the recent errors while the derivative component calculates the reaction of the power-generating system as a result of the rate at which the errors are changing. The calculated sum of these three activities is forwarded to the control system.

The main consideration in the use of PID controllers is to ensure the efficient and effective tuning of parameters. This is because, in practical situations, control systems have some characteristics, for example, nonlinearity, time-variability and system's delays. Also there are situations when the systems' parameters can change with time and operating environments [6]. Thus, the overriding objective of tuning PID controllers is to accurately obtain the parameters that appropriately satisfies the performance specifications of a closed-loop system in different operating environments. The popularity of the PID as a control procedure stems from its ease of use, simplicity of operation, ease of maintenance, low cost, ease of implementation, dynamism, effectiveness and efficiency [7]. Until the past two decades, the most popular PID has been the Ziegler-Nichols PID and the Cohen Coon PID [8].

However, the biggest problem in using PID, in general, and manual-based PID, in particular, is with the tuning of its parameters. Appropriate tuning of manual PID parameters requires technical expertise. The traditional tuning methods like the Ziegler-Nichols PID and the Cohen-Coon PID demand that the process models be minimized when they appear complex [9]. Through a procedure referred to as complex process minimization, these traditional methods, especially the Ziegler Nichols technique demands that the Integral and Derivative coefficients be set initially to zero, then the Proportional coefficient is then increased from zero until it gets to the predetermined Ultimate gain ( $K_u K_u$ ). It is believed that at this point, the output of the control system has reached a stable level and so the oscillations has got to a consistent level such that the oscillation time (dead time),  $P_u$ , is then used to set the PID coefficients [10]. Failure to adequately address this concern results in inappropriate tuning that leads to system overshoot, system-delays, steady-state errors and eventually affects the system stability [11].

The shortcomings of the traditional tuning methods like the Ziegler-Nichols PID and the Cohen-Coon PID necessitates the need for metaheuristic tuning algorithms like Genetic Algorithm PID (GA-PID) [12], Particle-Swarm Optimization PID (PSO-PID) [13], Ant Colony Optimization PID (ACO-PID) [14], PID-Tuner [15], Bacteria-Foraging Optimization PID (BFO-PID) [16] and now the African Buffalo Optimization (ABO-PID). In spite of the noble contributions of the existing metaheuristic tuning techniques, there still exists cases of systems overshoot, steady state error as well as delay in rise time and settling time [17, 18]. The need for further improvements, therefore, is the motivation for this study

The rest of this paper is organised in the following way: section two discusses the Automatic Voltage Regulators; section three examines the African Buffalo Optimization (ABO); section four focuses on the application of the ABO-PID and other techniques in tuning the parameters of a PID for an effective AVR. Moreover, section five draws conclusions on the study. This is followed by the acknowledgement of support for the study and then the references.

## 2. The automatic voltage regulators

The Automatic Voltage Regulator (AVR) is a vital component of any power generating system because helps to control the terminal voltage since it regulates the exciter voltage of the power generating system. The AVR is designed to constantly monitor the power system's terminal voltage at all times and under any load conditions. The AVR does this by ensuring that the generator's voltage operates within the preset system's limits. The AVR system is composed of four basic components: amplifier, exciter, generator and sensor. The function of these AVR

components can be represented linearly and represented mathematically as:

$$\text{Amplifier } \frac{V_{ref}(s)}{V_e(s)} = \frac{G_A}{1 + \tau_A(s)} \tag{1}$$

Where  $G_A$  denotes the Amplifier gain,  $V_{ref}(s)$  represents the reference voltage,  $V_e$  is the error voltage, and  $\tau_A$  denotes the Time constant in the S domain.

The usual values of  $G_A$  are between 10 and 400. The time constant of an amplifier time ranges from 0.02 to 0.1 s.

The transfer function of an exciter could be represented by a gain  $G_E$  coupled with a single time constant

$$\text{Exciter } \frac{V_F(s)}{V_{ref}(s)} = \frac{G_E}{1 + \tau_E(s)} \tag{2}$$

Here,  $G_E$  represents Exciter gain and  $\tau_E(s)$  is Time constant in the S domain. The usual values of  $G_E$  are between 10 and 400. The time constant of an Exciter is between 0.5 and 1.0 s.

Similarly, the transfer function of the generator terminal voltage in relation to its field voltage can be represented by a gain  $G_G$  coupled with a time constant

$$\text{Generator } \frac{V_T(s)}{V_{ref}(s)} = \frac{G_G}{1 + \tau_G(s)} \tag{3}$$

Please note that these constants are load-dependent,  $G_G$  could vary from 0.7 to 1.0, and between 1.0 s to 2.0 s (from full load to no load).

Finally, the sensor could be modelled by a simple first-order transfer function:

$$\text{Sensor } \frac{V_S(s)}{V_T(s)} = \frac{G_S}{1 + \tau_S(s)} \tag{4}$$

$T_R$  could be very small, usually between 0.001 and 0.06 s.

In general, the block diagram of a PID for an AVR is as shown in Fig 1 where the Amplifier, Exciter, Generator and Sensor represent the component parts of the AVR.

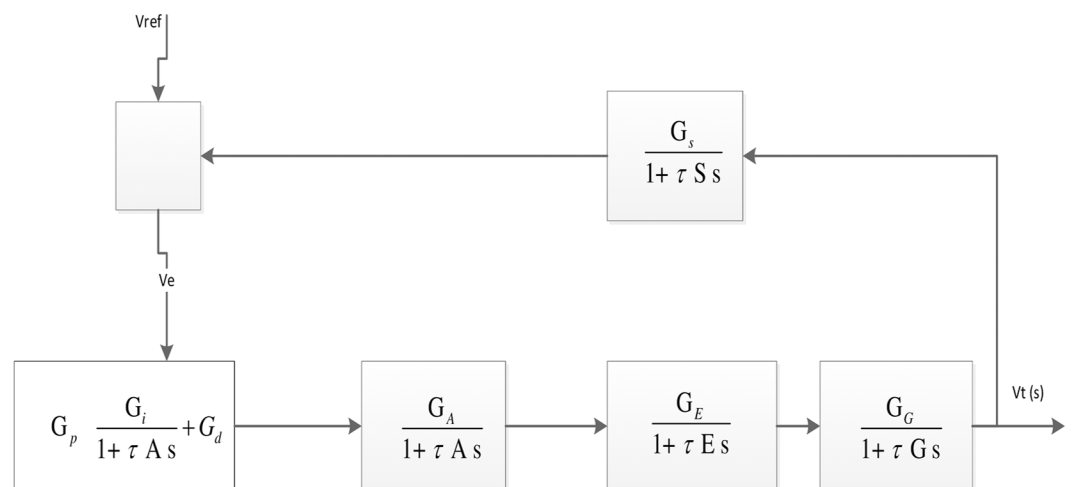

**Fig 1. Block diagram of an AVR system with a PID.**

<https://doi.org/10.1371/journal.pone.0175901.g001>

Usually any remarkable increase in the generator’s reactive power load is followed by a drop in the exciter’s voltage. This underscores the need for a PID controller in an AVR so as to minimize or, possibly, eradicate the error in voltage output and achieve voltage stability. Therefore, a properly functioning AVR intrinsically controlled by a properly-tuned PID influences the voltage level by a steady-state process and reduces or even totally eliminates the voltage oscillations during fleeting periods.

### 3. The African buffalo optimization algorithm

The African Buffalo Optimization is a recently developed algorithm with deliberate application of the lean metaheuristics design principles in mind [19, 20]. One of the current research directions in metaheuristics algorithm development is the need for lean metaheuristics algorithm design totally avoiding the Frankenstein phenomena [21]. Frankenstein phenomena refers to a situation in algorithm development where designers use several parameters to the extent that the individual contributions of a particular parameter to the overall working of the algorithm becomes difficult to pinpoint [22]. Since its development, the ABO has been successfully applied to solve numerical function optimization problems [23], symmetric Travelling Salesman’s Problems [24] and the asymmetric Travelling Salesman’s Problems [25, 26].

Basically, the African Buffalo Optimization is a simulation of the movement of African buffaloes from one location to the other in the vast African rainforests and savannahs in search of grazing pastures using two major vocalizations: the /waaa/ and the /maaaa/ calls. The /waaa/ call is used for exploration of the search space since where the buffaloes are presently has been sufficiently grazed or unsafe for further grazing while the /maaaa/ calls are used to summon the buffaloes for exploitation as the grazing landscape is lush and safe. The ABO algorithm is presented below:

1. Randomly initialize the buffaloes to nodes within the search space;
2. Update the buffaloes’ exploitation fitness:

$$m_k' = m_k + lp1(bg - w_k) + lp2(bp.k - w_k)$$

where  $m_k$  and  $w_k$  represents the exploitation and exploration moves respectively of the  $k^{th}$  buffalo ( $k = 1, 2, \dots, N$ );  $lp1$  and  $lp2$  are learning parameters;  $bg$  is the herd’s best fitness and  $bp$ , the individual buffalo’s best location.

3. Update the exploitation location of buffaloes using:

$$w_k' = \frac{(w_k + m_k)}{\lambda}$$

4. Is  $bg$  updating? Yes, go to 5. If No in 10 iterations, go to 1
5. If the stopping criteria is not reached, return to step 2, else go to 6
6. Output best solution.

#### ABO algorithm

In the ABO algorithm,  $w_k$  is used to represent the waaa (explore) calls of the buffaloes with particular reference to buffalo  $k$ . Similarly,  $m_k$  represents the maaa (exploit) call,  $w_k'$  represents the request for further exploration;  $m_k'$  is a request call for further exploitation;  $lp1$  and  $lp2$  are the learning parameters;  $\lambda$  takes a value of 0.1 to 2 depending on the problem under investigation: the higher the value, the more the exploitation and less of exploration and vice-

versa. The pseudocode of the ABO that details its step-by-step implementation strategy is presented below

1. **Begin**
2. Randomly initialize the buffalos to different locations within the search space;
3. **While** (until termination), do
4. **For**  $k = 1: N$  ( $N = \text{population}$ ), do
5. Evaluate the buffalos' exploitation fitness:
6.  $m_k' = m_k + lp1(bg - w_k) + lp2(bp_k - w_k)$
7. where  $m_k$  = exploitation move;  $w_k$  = exploration move;  $bg$  = position of the best buffalo;  $lp1$  and  $lp2$  denotes learning parameters;  $bg$  is the
8. herd's best fitness and  $bp_k$ , individual buffalo's best fitness
9. Update the location of buffalos using the Equation:
10.  $w_k' = \frac{(w_k + m_k)}{1}$
11. Is  $bg$  updating? Yes, go to 13. If No in 10 iterations, go to 2
12. **End for**
13. **End while**
14. Output best solution.
15. **End**

ABO pseudocode

The ABO algorithm's flowchart in [Fig 2](#)

## 4. ABO for proportional integral derivative tuning of automatic voltage regulator

As earlier stated, the main function of a PID controller is to stabilise the dynamic response of the AVR in addition to reducing or totally eliminate the steady-state error. The PID has three major parts, namely, the Proportional, Integral and Derivative mechanisms. The Proportional component ( $G_p$ ) of a PID controller system is used to minimize the rise time of the power system. It is, however, incapable of completely eliminating the steady-state error. The primary function of the integral component ( $G_i$ ) is to reduce or possibly eliminate the steady-state error for a step input. This component is also useful in slowing down the transient response of the power system. Similarly, the derivative control ( $G_d$ ) is useful in increasing the system stability by deliberately reducing or eliminating the system overshoot, thus, enhancing the transient response of the system.

### 4.1 ABO-PID search technique

The searching mechanism of the ABO-PID controller is itemized below.

Step 1: Initialize the buffalos on the search space in sets of three buffalos per set. That is to say that if there are a population of  $N$  buffalos, they will consist of  $N/3$  components. Set  $s$  which represents the step function as 2

Step 2: Determine the exploitation fitness of each buffalo in the population using the Eqs 5 and 6 respectively

$$m_k' = m_k + lp1(bg - w_k) + lp2(bp.k - w_k) \tag{5}$$

$$w_k' = \frac{(w_k + m_k')}{\lambda} \tag{6}$$

Step 3: Determine  $Gp$   $Gi$  and  $Gd$  for each set of buffalos

Step 4: Plot the  $Gp$   $Gi$  and  $Gd$  into the PID transfer function represented by Equation

$$Gp(s) + \frac{Ki}{S} + Gd(s) \tag{7}$$

Determine the buffalo set with the best performance and set as  $bg$

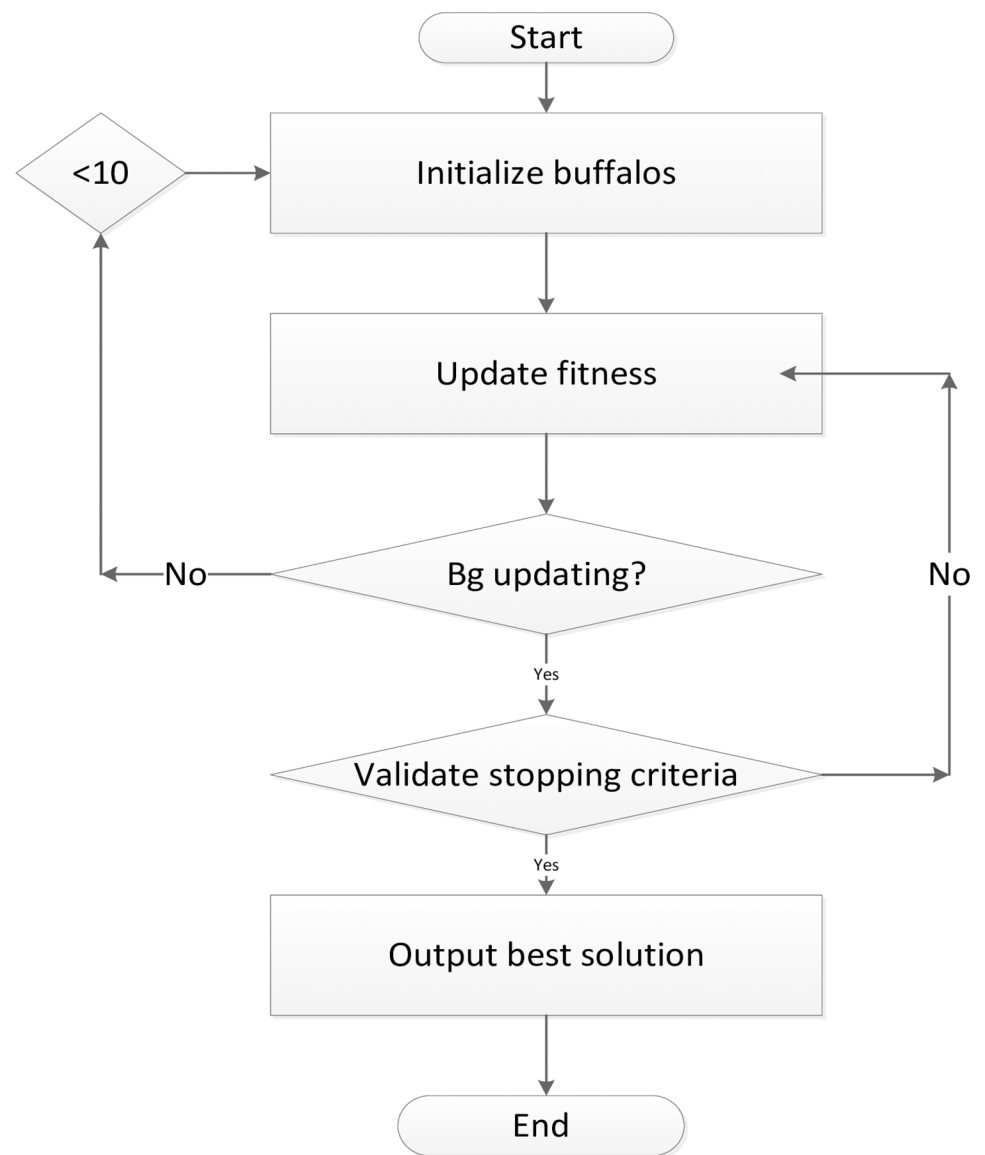

Fig 2. ABO flowchart.

<https://doi.org/10.1371/journal.pone.0175901.g002>

Step 5: Set the values of  $x/y$ . If the output is 1 which represents the steady state, proceed to Step 6, else return to Step 2

Step 6: Plot the output into a MATLAB tool to determine the rise time, settling time, percentage overshoot and the steady state error.

### 4.2 PID to AVR implementations

An implementation of the ABO-PID, PSO-PID, ACO-PID, PSO-PID, PID-PSO, GA-PID, GA-PID, LQR-PID and BFO-PID were executed in order to test their capacity to tune the AVR (Please see Figs 3–9). The parameters are presented in Table 1:

It should be noted that the variable  $V_e$  in the Block diagram (Fig 1) is obtained by Eq 8

$$V_e = V_t(s) - V_{ref}(s) \tag{8}$$

In the above Equation represents,  $V_e$  represents the tracking error and it is obtained by subtracting the reference (input) signal ( $V_{ref}(s)$ ) from the output signal ( $V_t(s)$ ). The error signal ( $V_e$ ) is then sent to the PID controller whose duty it is to calculate the proportional, the integral and the derivative of this error signal.

Similarly, the transfer function of a PID Controller is:

$$Gp + \frac{Ki}{S} + Gd(s) \tag{9}$$

Also, the transfer function of the AVR components is:

$$\frac{\Delta V_t(s)}{\Delta V_{ref}(s)} = \frac{(S^2 Gd + S Gp + Gi) (K_A K_E K_G K_S) (1 + S T_s)}{S(1 + S \tau_A) (1 + S \tau_E) (1 + S \tau_G) (1 + S \tau_S) (S^2 Gd + S Gp + Gi) (K_A K_E K_G K_S)} \tag{10}$$

The ABO-PID was implemented in a MATLAB code, executed using a MATLAB 2012b compiler. The outcome of this experiment is compared with results from other optimization algorithms such as PSO-PID, ACO-PID, PSO-PID, PID-PSO, GA-PID, LQR-PID, and BFO-PID (See Figs 3–9). The simulation result is presented in Table 2.

Table 2 presents an interesting fact that authenticates the No Free Lunch theorem of optimization algorithms [27]. This Table highlights the strengths and weaknesses of each of the comparative algorithms to the extent that a parameter that is of particular interest to a researcher will determine his choice of an algorithm. It must be observed, nonetheless, that the ABO had a remarkable run in this set of experiments since it was the only Tuner that had 0% gain overshoot as well as 0% steady state error. Other good performers in these counts (gain overshoot and steady state error) are the GA-PID with 0% gain overshoot and 0.005% steady state error and PSO-PID with 0% gain overshoot and 0.008% steady state error. The other Tuners were not as good in these counts.

In terms of the Rise time, however, the ABO-PID had its worst result (1.77 seconds). The GA-PID and the ACO-PID were the fastest with 0.493 seconds, followed by the BFO-PID and the PSO-PID with 0.49993 seconds, LQR-PID with 0.500 seconds and PID-PSO with 0.684 seconds. With respect to the Settling time, the LQR-PID proved to be the best with 2.3355 seconds, closely followed by the ABO-PID with 2.85 seconds and PID-PSO with 3.087 seconds. The other metaheuristic tuners were rather slow in their settling times. The ABO rise time was rather slow because of the algorithm’s search procedure that requires the calculation of both exploitation (/maaa/) fitness and exploration (waaa) fitness of each buffalo in each iteration before converging at a solution. The algorithm achieves relatively fast convergence because of its use of just two controlling parameters, the  $lp1$  and  $lp2$ . The use of few parameters results in

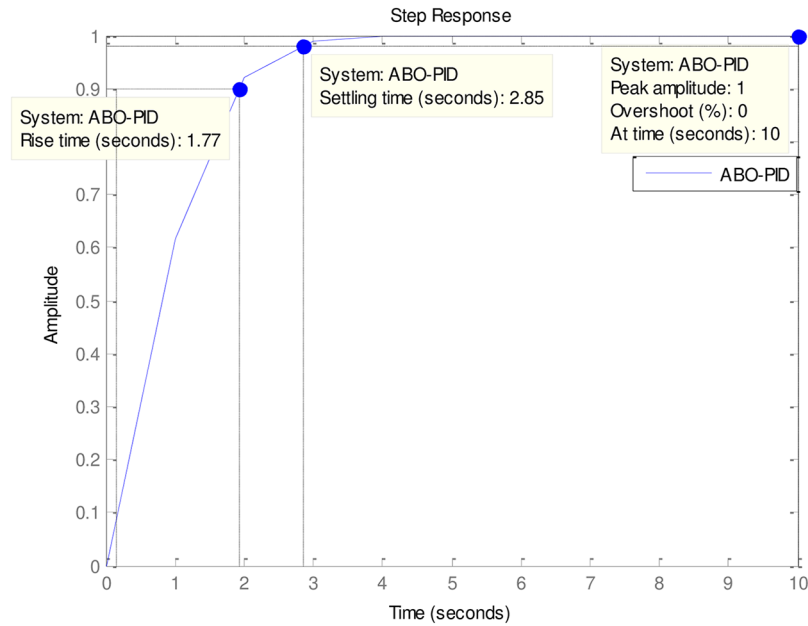

**Fig 3. ABO-PID.**

<https://doi.org/10.1371/journal.pone.0175901.g003>

fewer evaluations per iteration since an algorithm is required to evaluate each of its parameters before arriving at a solution.

Of special interest is the performance of FO-PSO-PID which had no gain overshoot but has the slowest rise time and settling time. That is to say that it sacrificed the rise time and settling time in its attempt to have 0% gain overshoot (See Fig 7).

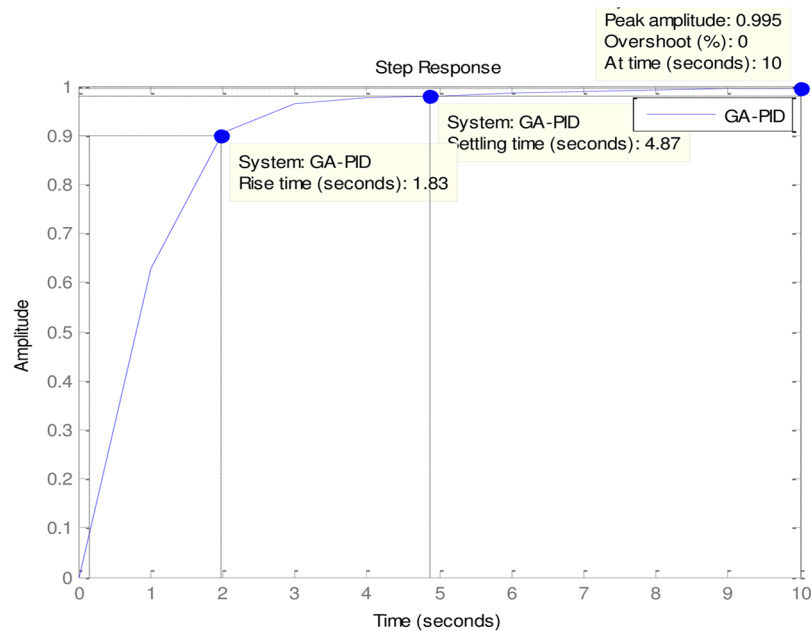

**Fig 4. GA-PID.**

<https://doi.org/10.1371/journal.pone.0175901.g004>



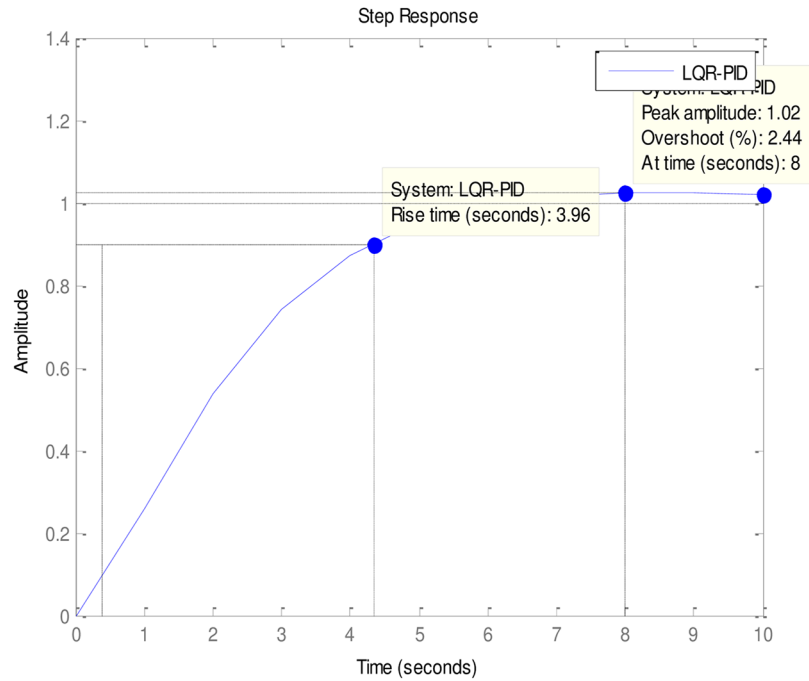

**Fig 5. LQR-PID.**

<https://doi.org/10.1371/journal.pone.0175901.g005>

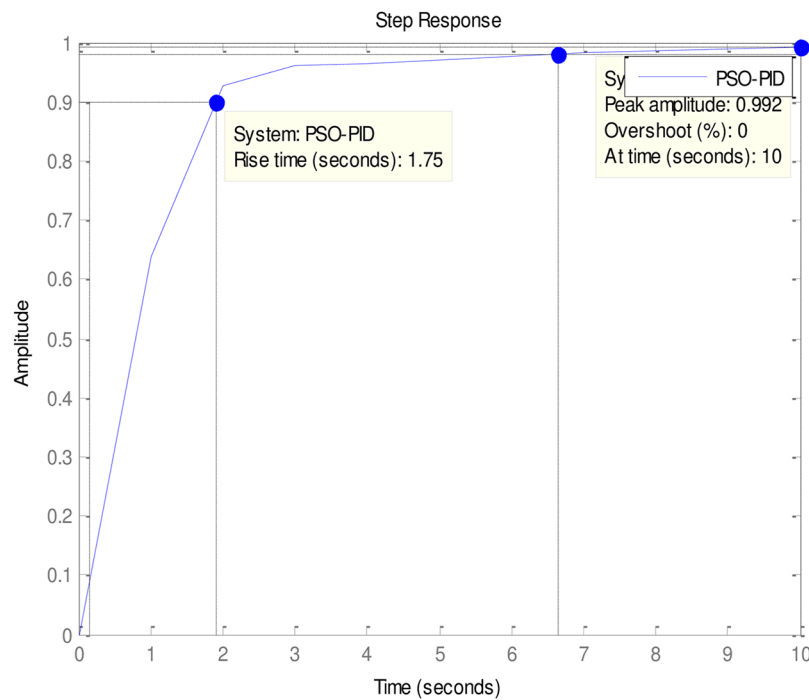

**Fig 6. PSO-PID.**

<https://doi.org/10.1371/journal.pone.0175901.g006>

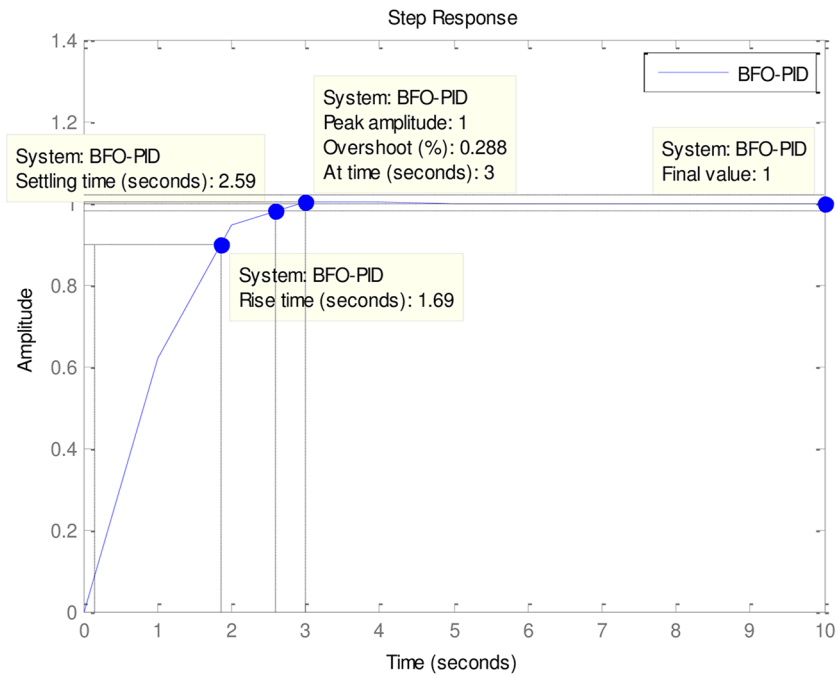

**Fig 7. BFO-PID.**

<https://doi.org/10.1371/journal.pone.0175901.g007>

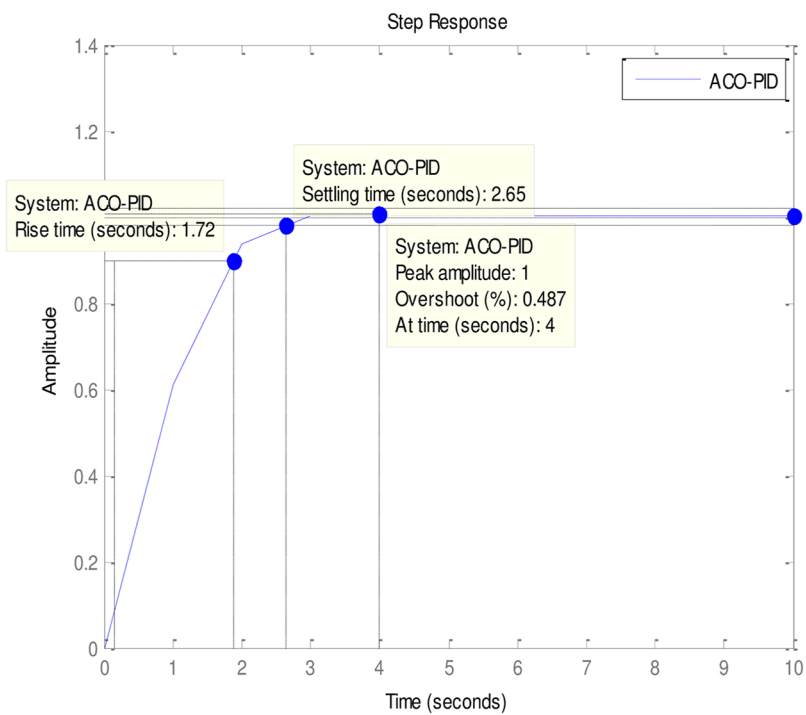

**Fig 8. ACO-PID.**

<https://doi.org/10.1371/journal.pone.0175901.g008>

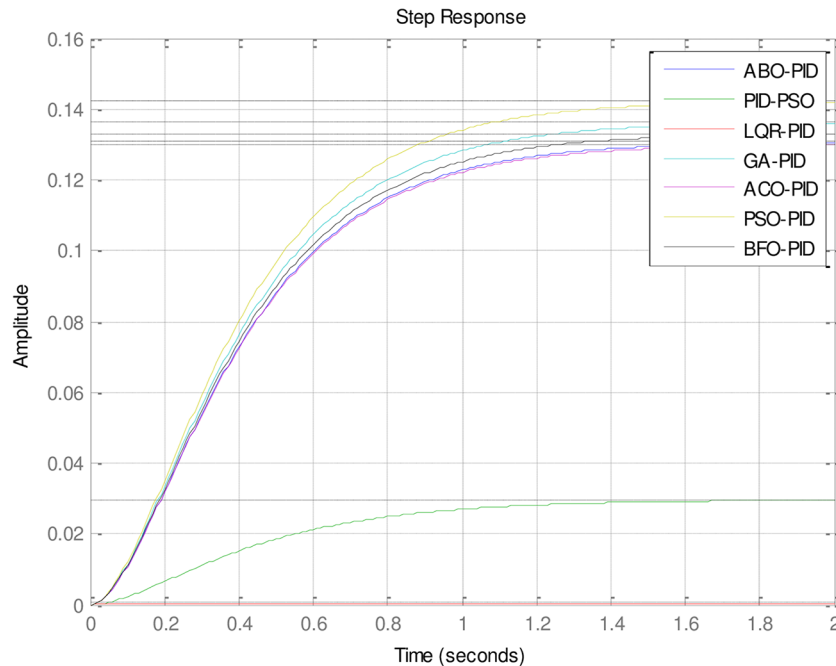

**Fig 9. Dynamic comparative output.**

<https://doi.org/10.1371/journal.pone.0175901.g009>

### 4.3. More experimental evaluations

In the light of the good of the good performances of the Tuners in Table 2, it is necessary to examine the performances of some other less popular but very effective Tuners vis-à-vis the ABO’s performance. These other Tuners are mostly hybrid Tuners since they are designed from some hybridized algorithms. The comparative Tuners here are the PID-Tuner [28], Real Coded Genetic Algorithm PID (RC-GA PID) and the Binary-Coded Genetic Algorithm (BC-GA PID) PID [29] (See Figs 10–13).

As can be observed in Table 3, all the Tuners here performed extremely well. In fact, all the Tuners obtained 0% gain overshoot (Please see Figs 10–13). Nevertheless, the ABO-PID was the only Tuner able to obtain 0% steady state error in addition to 0% gain overshoot. Moreover, in terms of the Rise time, the fastest Tuner in Table 3 is RC-GA PID with 0.849 seconds, followed closely by BC-GA PID with 0.0.854 seconds and the PID-Tuner with 0.87 seconds. Just like in Table 2, the ABO-PID is neither a fast riser nor a fast settler. It had the slowest Rise time and Settling Time here. Aside having the fastest Rise time, the RC-GA also had the fastest

**Table 1. Experimental parameters.**

| Parameters | Values |
|------------|--------|
| $K_A$      | 10     |
| $K_E$      | 1.0    |
| $K_G$      | 1.0    |
| $K_S$      | 1.0    |
| $\tau_A$   | 0.1    |
| $\tau_E$   | 0.4    |
| $\tau_G$   | 1.0    |
| $\tau_S$   | 0.01   |

<https://doi.org/10.1371/journal.pone.0175901.t001>

Table 2. Simulation results.

| Gain Overshoot (%) | Type of controller | PID Parameters |        |        | Rise Time (secs) | Settling Time (secs) | Steady State Error |
|--------------------|--------------------|----------------|--------|--------|------------------|----------------------|--------------------|
|                    |                    | $G_p$          | $G_i$  | $G_d$  |                  |                      |                    |
| 0                  | ABO-PID            | 3.007          | 1.0734 | 0.4304 | 1.77             | 2.85                 | 0                  |
| 8.99               | PID_PSO            | 0.6125         | 0.4197 | 0.2013 | 0.684            | 3.087                | 0.06               |
| 2.44               | LQR-PID            | 1.0100         | 0.5000 | 0.1000 | 0.500            | 2.335                | 0.02               |
| 0                  | GA-PID             | 3.1563         | 0.9463 | 0.4930 | 0.493            | 8.900                | 0.005              |
| 0.487              | ACO-PID            | 2.9917         | 1.1053 | 0.3085 | 0.493            | 7.100                | 0                  |
| 0                  | PSO-PID            | 3.3172         | 0.8993 | 0.2814 | 0.4993           | 10.200               | 0.008              |
| 0.288              | BFO-PID            | 3.0725         | 1.1054 | 0.2601 | 0.4993           | 6.800                | 0                  |

<https://doi.org/10.1371/journal.pone.0175901.t002>

Settling time of 1.52 seconds, followed by the BC-GA with 1.53 seconds and the PID-Tuner with 0.56 seconds (See Fig 14).

In the light of the performances of the comparative Tuners in Table 3, a trend could be noticeable and that is that the Tuners Rise times correlates with Settling times. That is to say, that the first Tuner to rise will also, likely, be the first to settle and vice-versa (refer to Figs 10–13). From the foregoing analysis, it can be adduced that a good tuner is one that does a fair trade off in balancing the performance of different parameters in its quest to obtain effective and efficient tuning. The strength of the ABO-PID stands out in its ability to maintain a good balancing of the power generating parameters, thus ensuring harmonious, effective and efficient working of the AVR system.

### 5. Conclusion

The sudden but steady popularity of Proportional-Integral-Derivate (PID) controllers to the tuning of vital paramters in power engineering devices such as DC motors and Automatic Voltage Regulators is attracting the attention of researchers. This popularity stems from their

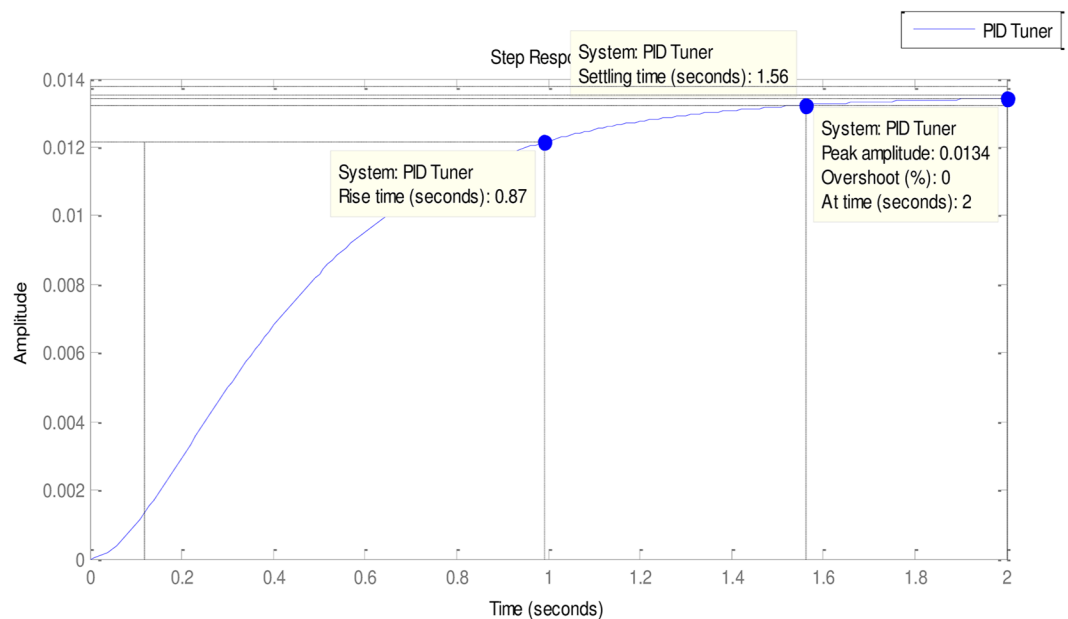

Fig 10. PID tuner.

<https://doi.org/10.1371/journal.pone.0175901.g010>

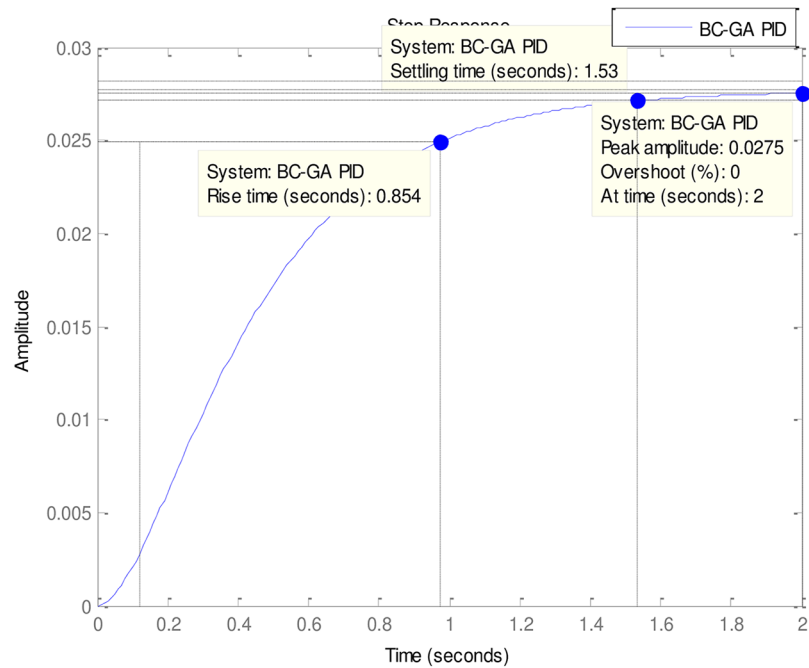

**Fig 11. BC-GA-PID.**

<https://doi.org/10.1371/journal.pone.0175901.g011>

simple implementation strategies, robustness, efficiency and effectiveness of PID controllers. The main consideration in designing PID controllers is ensuring the appropriate tuning of its parameters. Metaheuristic tuning of PID controllers has proven to be much more versatile, efficient and effective than manual tuning which is rather difficult and time-consuming. This

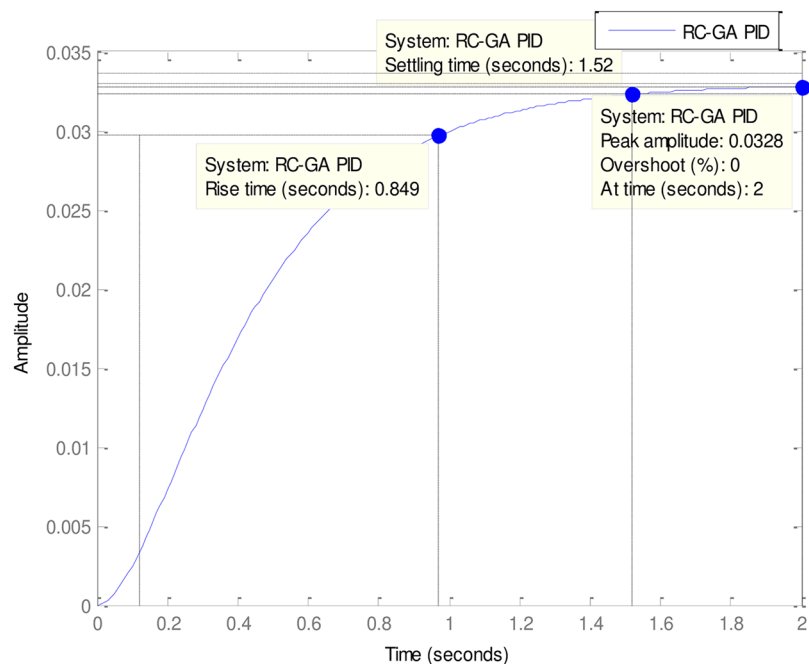

**Fig 12. RC-GA-PID.**

<https://doi.org/10.1371/journal.pone.0175901.g012>

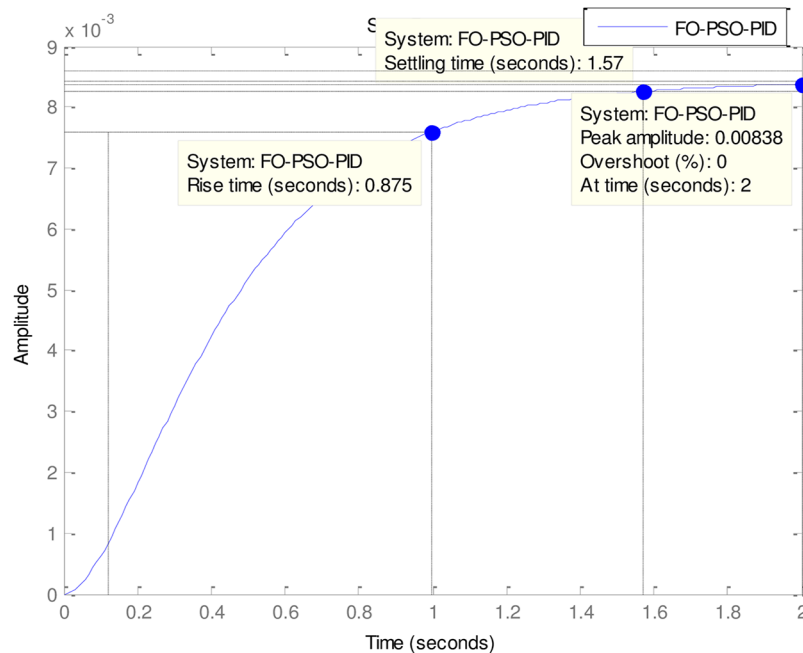

**Fig 13. FO-PSO-PID.**

<https://doi.org/10.1371/journal.pone.0175901.g013>

success of metaheuristic tuning of PID parameters has led to the application of metaheuristics like the Genetic Algorithm (GA), Ant Colony Optimization (ACO), Particle Swarm Optimization (PSO) and the Fruit Fly Optimization Algorithm (FOA) etc. to PID parameters-tuning.

In the light of the above, this paper applies the African Buffalo Optimization to tune the PID Controller’s parameters of the AVR with the aim of improving the results from the existing metaheuristic tuning techniques. After a number of experimental evaluations, the ABO-PID has been proven to be quite effective. Comparative experimental results indicate that the ABO-PID was the only method that obtained optimal solution (0%) in the gain overshoot and steady state error indices. Next to the ABO-PID was the GA-PID that obtained 0% in gain overshoot and 0.005% in the steady state error. Also the performance of the PSO-PID was very commendable with 0% gain overshoot and 0.008% steady state error. The ACO-PID obtained 0.487% gain overshoot and 0% steady state error which is also a good performance. However, it must be observed that the ABO-PID needs further improvement in its Rise time and Settling time.

From the foregoing discussion, therefore, it is safe to conclude that the newly-designed ABO-PID controller has proven to be a reliable algorithm for the parameter tuning of AVR.

**Table 3. More experimental results.**

| Gain Overshoot (%) | Type of controller | PID Parameters |        |        | Rise Time secs | Settling Time (secs) | Steady State Error |
|--------------------|--------------------|----------------|--------|--------|----------------|----------------------|--------------------|
|                    |                    | $G_p$          | $G_i$  | $G_d$  |                |                      |                    |
| 0                  | PID_TUNER          | 0.2736         | 0.1723 | 0.1150 | 0.87           | 1.56                 | 0.0134             |
| 0                  | ABO-PID            | 3.007          | 1.0734 | 0.4304 | 1.77           | 2.85                 | 0                  |
| 0                  | BC-GA              | 0.5692         | 0.2484 | 0.1258 | 0.854          | 1.53                 | 0.028              |
| 0                  | RC-GA              | 0.6820         | 0.2660 | 0.1790 | 0.849          | 1.52                 | 0.033              |
| 0                  | FO-PSO-PID         | 0.1700         | 0.0300 | 0.0140 | 0.875          | 1.57                 | 0.008              |

<https://doi.org/10.1371/journal.pone.0175901.t003>

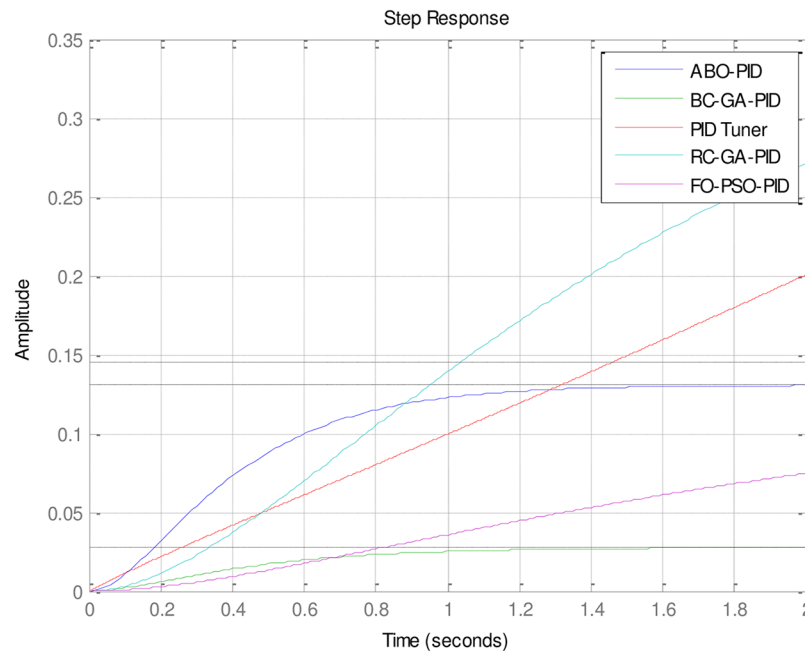

**Fig 14. Dynamic performance output.**

<https://doi.org/10.1371/journal.pone.0175901.g014>

The ABO-PID controller has displayed superior tuning capability of PID parameters of an AVR system by achieving a good trade-off between the time-domain indices in arriving at a stable power system. However, in tandem with the No Free Lunch theorem [27], it is recommended that the parameter of utmost relevance to a researcher may determine his choice of a metaheuristic Tuner. If the most important consideration is the 0% gain overshoot and 0% steady state error, then the ABO-PID is the obvious choice. But if a researcher is more concerned with a system that has the fastest rise time the GA-PID and the ACO-PID are better choices. Similarly, if a system with the fastest settling time is the primary concern, then the RC-GA PID and BC-GA PID are the obvious choices. Finally, we recommend further experimental investigations of other metaheuristic tuners of AVR not covered in this study for the benefit of researchers and practitioners in search of efficient and effective Tuners.

## Acknowledgments

The author is grateful to the Faculty of Computer Systems and Software Engineering, Universiti Malaysia Pahang, Kuantan, Malaysia, for funding this study under Grant GRS 1403118. Also, our gratitude to the Ministry of Higher Education, Malaysia, for additional funding under Fundamental Research Grant Scheme RDU 140101

## Author Contributions

**Conceptualization:** JBO.

**Data curation:** JBO.

**Formal analysis:** JBO.

**Funding acquisition:** AN.

**Investigation:** JBO.

**Methodology:** JBO.

**Project administration:** MNMK.

**Resources:** MNMK.

**Software:** JBO.

**Supervision:** AN.

**Validation:** JBO.

**Visualization:** JBO.

**Writing – original draft:** JBO.

**Writing – review & editing:** JBO.

## References

1. Lees F. Lees' Loss prevention in the process industries: Hazard identification, assessment and control: Butterworth-Heinemann; 2012.
2. Lipták BG. Process Control: Instrument Engineers' Handbook: Butterworth-Heinemann; 2013.
3. Tenne Y, Goh C-K. Computational intelligence in expensive optimization problems: Springer Science & Business Media; 2010.
4. Nagaraj B, Muruganath N, editors. A comparative study of PID controller tuning using GA, EP, PSO and ACO. Communication Control and Computing Technologies (ICCCCT), 2010 IEEE International Conference on; 2010: IEEE.
5. Zou C, Manzie C, Nešić D. A framework for simplification of PDE-based lithium-ion battery models. IEEE Transactions on Control Systems Technology. 2016; 24(5):1594–609.
6. Odili JB, 2013. Application of Ant Colony Optimization to Solving the Traveling Salesman's Problem. Science Journal of Electrical & Electronic Engineering. 2013; 2013(1):175–7.
7. Kushwah M, Patra A. Tuning PID Controller for Speed Control of DC Motor Using Soft Computing Techniques-A Review. Advance in Electronic and Electric Engineering. 2014; 4(2):141–8.
8. Giwa A, Karacan S. Decoupling PID control of a reactive packed distillation column. Decoupling PID Control of a Reactive Packed Distillation Column. 2012; 1(6):1924–33.
9. Korkmaz M, Aydoğdu Ö, Doğan H, editors. Design and performance comparison of variable parameter nonlinear PID controller and genetic algorithm based PID controller. Innovations in Intelligent Systems and Applications (INISTA), 2012 International Symposium on; 2012: IEEE.
10. Ramakrishnan V, Venugopal P, Mukherjee T. Proceedings of the International Conference on Information Engineering, Management and Security 2015: ICIEMS 2015: Association of Scientists, Developers and Faculties (ASDF); 2015.
11. Shahrokhi M, Zomorodi A. Comparison of PID controller tuning methods. Department of Chemical & Petroleum Engineering Sharif University of Technology. 2013.
12. Neath MJ, Swain AK, Madawala UK, Thrimawithana DJ. An optimal PID controller for a bidirectional inductive power transfer system using multiobjective genetic algorithm. Power Electronics, IEEE Transactions on. 2014; 29(3):1523–31.
13. Solihin MI, Tack LF, Kean ML. Tuning of PID controller using particle swarm optimization (PSO). International Journal on Advanced Science, Engineering and Information Technology. 2011; 1(4):458–61.
14. Ünal M, Ak A, Topuz V, Erdal H. Optimization of PID controllers using ant colony and genetic algorithms: Springer; 2012.
15. Aravind P, Valluvan M, Ranganathan S. Modelling and Simulation of Non Linear Tank. International Journal of Advanced Research in Electrical, Electronics and Instrumentation Engineering. 2013; 2(2):842–9.
16. Manuaba IB, Abdillah M, Priyadi A, Purnomo MH. COORDINATED TUNING OF PID-BASED PSS AND AVR USING BACTERIAL FORAGING-PSOTVAC-DE ALGORITHM. Control and Intelligent Systems. 2015; 43(3).



17. Bayram MB, Bülbül Hİ, Can C, Bayindir R, editors. Matlab/GUI based basic design principles of PID controller in AVR. Power Engineering, Energy and Electrical Drives (POWERENG), 2013 Fourth International Conference on; 2013: IEEE.
18. Li X, Yu W, editors. A systematic tuning method of PID controller for robot manipulators. Control and Automation (ICCA), 2011 9th IEEE International Conference on; 2011: IEEE.
19. Odili JB, Kahar MNM. African Buffalo Optimization (ABO): a New Meta-Heuristic Algorithm.
20. Odili JB, Kahar MNM, Anwar S. African Buffalo Optimization: A Swarm-Intelligence Technique. *Procedia Computer Science*. 2015;(IEEE-IRIS 2015).
21. Sörensen K, Glover FW. Metaheuristics. *Encyclopedia of operations research and management science*: Springer; 2013. p. 960–70.
22. Sörensen K. Metaheuristics—the metaphor exposed. *International Transactions in Operational Research*. 2015; 22(1):3–18.
23. Odili JB, Kahar MNM. Numerical Function Optimization Solutions Using the African Buffalo Optimization Algorithm (ABO). *British Journal of Mathematics & Computer Science*. 2015; 10(1):1–12.
24. Odili JB, Mohmad Kahar MN. Solving the Traveling Salesman's Problem Using the African Buffalo Optimization. *Computational Intelligence and Neuroscience*. 2015; 501:929547.
25. Odili JB, Mohmad Kahar MN. Solving the Traveling Salesman's Problem Using the African Buffalo Optimization. *Computational Intelligence and Neuroscience*. 2016; 2016:12.
26. Odili JB, Kahar MNM, Anwar S, Azrag MAK, editors. A comparative study of African Buffalo Optimization and Randomized Insertion Algorithm for asymmetric Travelling Salesman's Problem. *Software Engineering and Computer Systems (ICSECS)*, 2015 4th International Conference on; 2015: IEEE.
27. Xu H, Caramanis C, Mannor S. Sparse algorithms are not stable: A no-free-lunch theorem. *Pattern Analysis and Machine Intelligence, IEEE Transactions on*. 2012; 34(1):187–93.
28. Bhatt VK, Bhongade S. Design of PID controller in automatic voltage regulator (AVR) system using PSO technique. *International Journal of Engineering Research and Applications (IJERA)*. 2013; 3(4):1480–5.
29. Chang W-D. Nonlinear system identification and control using a real-coded genetic algorithm. *Applied Mathematical Modelling*. 2007; 31(3):541–50.
